# Supplementary material for: The preseason warming of the Indian Ocean resulting in soybean failure in US
Source: Copernicus journal article supplement (doi:10.5194/esd-16-2187-2025), 2025-12-05
Supplement: Supplementary file 1 [file esd-16-2187-2025-supplement.pdf]

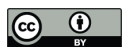

*Supplement of*

## **The preseason warming of the Indian Ocean resulting in soybean failure in US**

**Menghan Li et al.**

*Correspondence to:* Xichen Li (xichenli@pku.edu.cn)

The copyright of individual parts of the supplement might differ from the article licence.

## Supplementary

Note: References cited in the Supplementary Material are included in the main manuscript reference list.

Table S1: Meteorological variables used in this study, their definitions, sources, and references.

| Variable | Definition / Source                                                       | References                             |
|----------|---------------------------------------------------------------------------|----------------------------------------|
| Tmx      | Maximum temperature (°C), CRU TS v4.07                                    | Gaupp et al., 2020; Hamed et al., 2021 |
| Tmp      | Mean temperature (°C), CRU TS v4.07                                       | Joshi et al., 2021; Ray et al., 2015   |
| Tmn      | Minimum temperature (°C), CRU TS v4.07                                    | Schauberger et al., 2017               |
| Pre      | Precipitation (mm·d <sup>-1</sup> ), CRU TS v4.07                         | Leng and Hall, 2019; Li et al., 2019   |
| DSRF     | Downward shortwave radiation flux (W·m <sup>-2</sup> ), CRU TS v4.07      | Schauberger et al., 2017               |
| Wet      | Wet day frequency (days), CRU TS v4.07                                    | Gobin and Van de Vyver, 2021           |
| SMroot   | Soil moisture (m <sup>3</sup> ·m <sup>-3</sup> ), ERA5, Layer 2 (7-28 cm) | Otkin et al., 2016                     |
| VPD      | Vapor pressure deficit (hPa), derived from Tmp and ea                     | Ergo et al., 2018                      |
| DTR      | Diurnal temperature range (°C), CRU TS v4.07                              | Joshi et al., 2021                     |
| Cld      | Cloud cover (%), CRU TS v4.07                                             | Exploratory (this study)               |

Table S2: Oceanic indices used in this study and their definitions and source

| Index   | Definition                                                                                                                                                      | Source                                                                                                                      |
|---------|-----------------------------------------------------------------------------------------------------------------------------------------------------------------|-----------------------------------------------------------------------------------------------------------------------------|
| Niño1+2 | The averaged SSTA in the region (0°-10° S, 90°-80° W)                                                                                                           | <a href="https://psl.noaa.gov/data/correlation/nina1.anom.data">https://psl.noaa.gov/data/correlation/nina1.anom.data</a>   |
| Niño3.4 | The averaged SSTA in the region (5° N-5° S, 150°-90° W)                                                                                                         | <a href="https://psl.noaa.gov/data/correlation/nina34.anom.data">https://psl.noaa.gov/data/correlation/nina34.anom.data</a> |
| Niño3   | The averaged SSTA in the region (5° N-5° S, 170°-120° W)                                                                                                        | <a href="https://psl.noaa.gov/data/correlation/nina3.anom.data">https://psl.noaa.gov/data/correlation/nina3.anom.data</a>   |
| Niño4   | The averaged SSTA in the region (5° N-5° S, 160° E-150° W)                                                                                                      | <a href="https://psl.noaa.gov/data/correlation/nina4.anom.data">https://psl.noaa.gov/data/correlation/nina4.anom.data</a>   |
| SOI     | A measure based on the difference in SLP anomalies between Tahiti and Darwin, Australia                                                                         | <a href="https://psl.noaa.gov/data/correlation/soi.data">https://psl.noaa.gov/data/correlation/soi.data</a>                 |
| PDO     | The leading principal component of monthly SSTA in the North Pacific Ocean                                                                                      | <a href="https://psl.noaa.gov/data/correlation/pdo.data">https://psl.noaa.gov/data/correlation/pdo.data</a>                 |
| NPI     | The area-weighted SLP over the region (30° N-65° N, 160° E-140° W)                                                                                              | <a href="https://psl.noaa.gov/data/correlation/np.data">https://psl.noaa.gov/data/correlation/np.data</a>                   |
| TSA     | The averaged SSTA in the region (0°-20° S, 10° E-30° W)                                                                                                         | <a href="https://psl.noaa.gov/data/correlation/tsa.data">https://psl.noaa.gov/data/correlation/tsa.data</a>                 |
| TNA     | The averaged SSTA in the region (5.5°N-23.5°N, 15°-57.5°W)                                                                                                      | <a href="https://psl.noaa.gov/data/correlation/tna.data">https://psl.noaa.gov/data/correlation/tna.data</a>                 |
| AMO     | The averaged SSTA in the North Atlantic Ocean (0°-70° N)                                                                                                        | <a href="https://psl.noaa.gov/data/correlation/amon.us.data">https://psl.noaa.gov/data/correlation/amon.us.data</a>         |
| IOD     | The difference in SSTA between the western equatorial Indian Ocean (50°-70° E, 10° S-10° N) and the southeastern equatorial Indian Ocean (90°-110° E, 10° S-0°) | calculated                                                                                                                  |
| IOB     | The averaged SSTA in the region (20° S-20° N, 40° -110° E)                                                                                                      | calculated                                                                                                                  |

Table S3: Regression coefficients of various meteorological factors in ridge regression

| Variable | Coefficient |
|----------|-------------|
| DTR      | -0.66735    |
| SMroot   | 0.627568    |
| Tmx      | -0.527428   |
| Tmp      | -0.446923   |
| Pre      | -0.402184   |
| Tmn      | -0.030895   |
| Cld      | 0.328608    |
| Wet      | -0.108994   |
| VPD      | -0.106505   |
| DSRF     | 0.089041    |

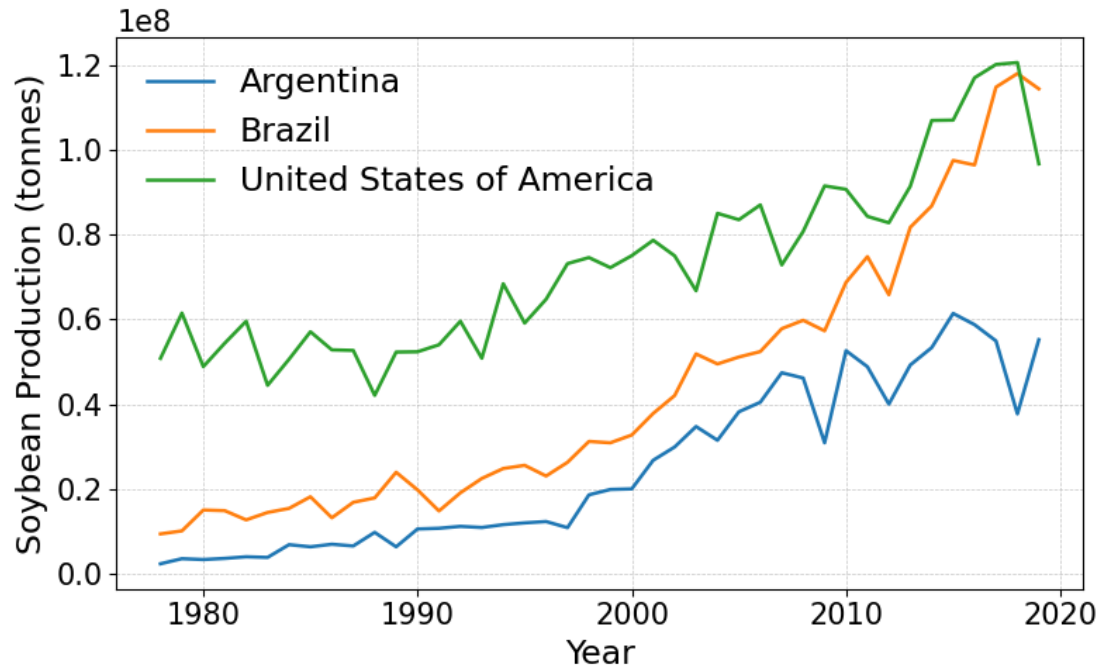

Figure S1: Time series of total soybean production in Argentina, Brazil, and the United States of America from 1978 to 2019, based on FAOSTAT data. Values are reported in tonnes (t).

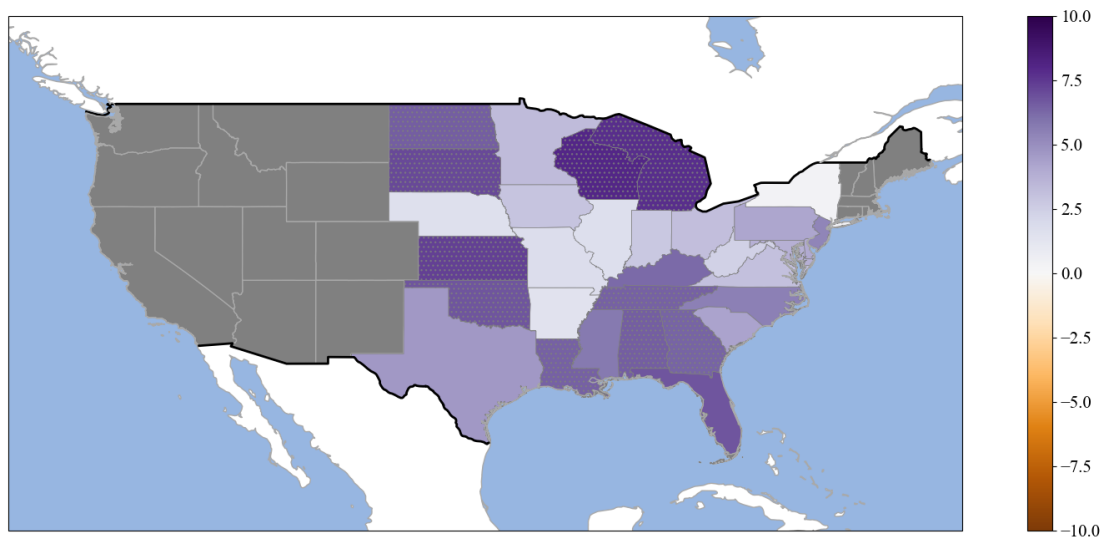

Figure S2: Spatial distribution of the sensitivity of soybean yield anomalies to the standardized Niño3.4 index during MJJ (May–July) from 1980 to 2017. The values represent the change in the percent yield anomaly per one standard deviation ( $1\sigma$ ) increase in the standardized Niño3.4 index. Dots indicate statistically significant correlations at the 90% confidence level (t-test).

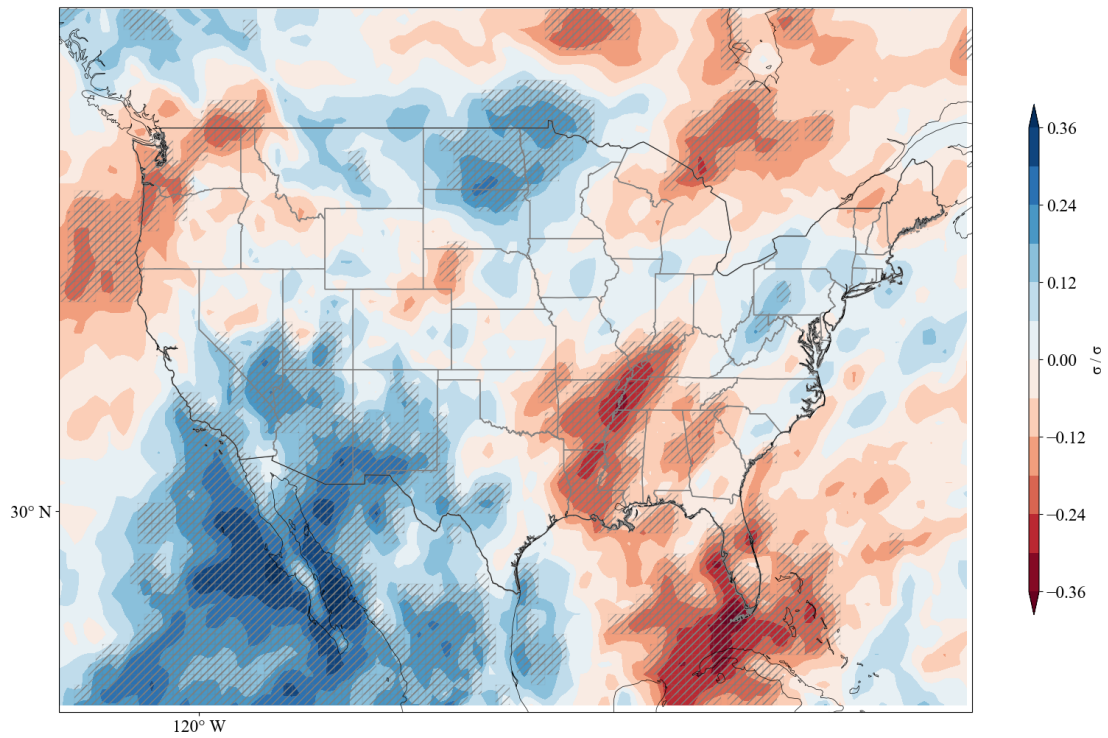

Figure S3: Responses of vertically integrated moisture divergence ( $\text{kg}\cdot\text{m}^{-2}$ ) to the standardized IOB index during ND(-1)J. The variable was standardized before analysis. Values indicate the standardized change (in  $\sigma$  units) in vertically integrated moisture divergence per  $1\sigma$  increase in the standardized IOB index. Shaded areas with diagonal hatching indicate regions where the response is statistically significant at the 90% confidence level (t-test).

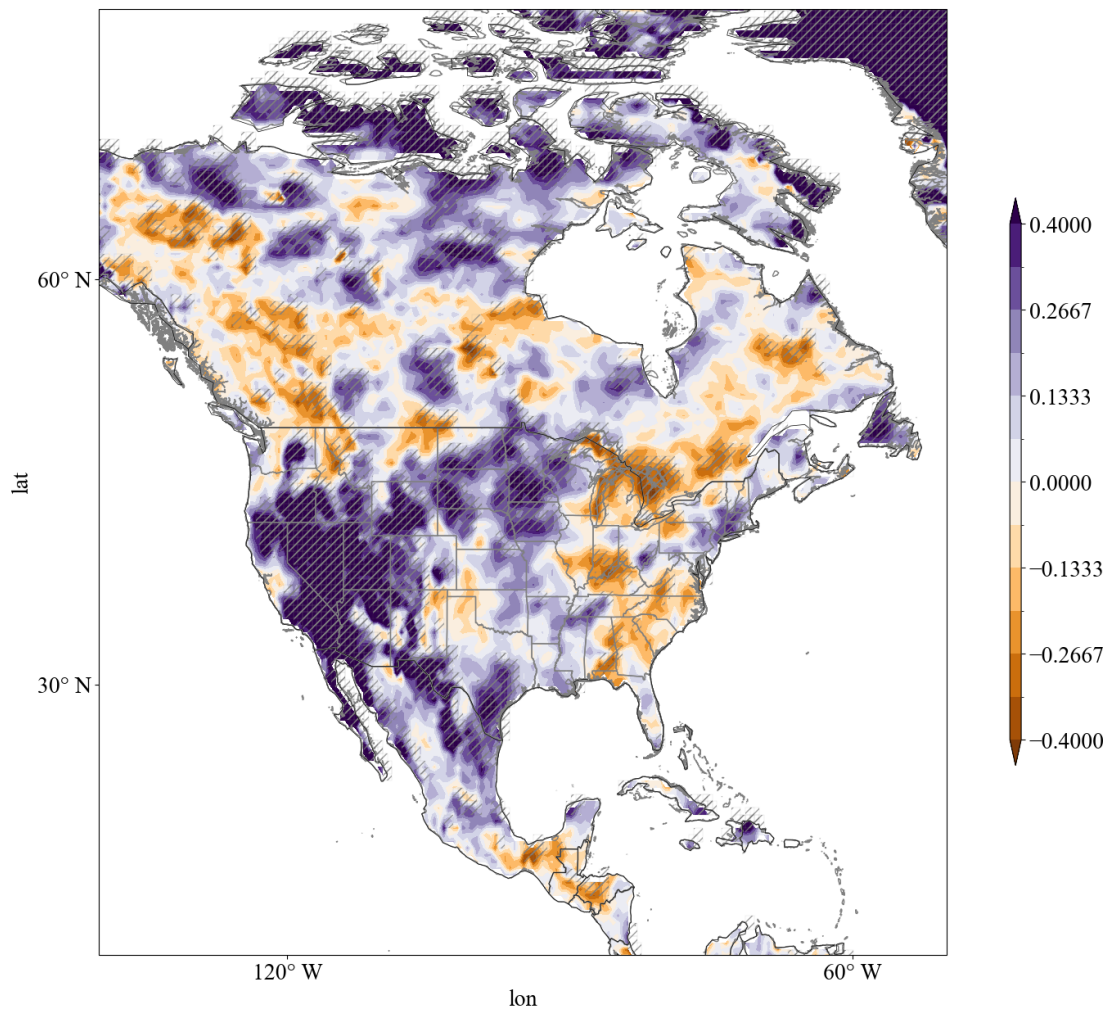

Figure S4: The correlation between SMroot during ND(-1)J and during JAS. Shaded areas with diagonal hatching indicate regions where the response is statistically significant at the 90% confidence level (t-test).



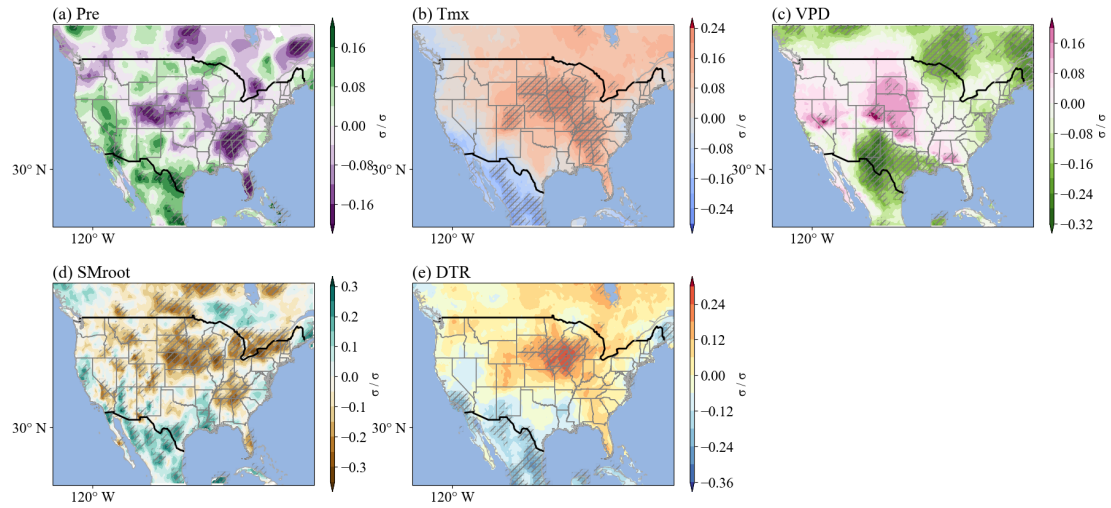

Figure S5: Responses of (a) precipitation (Pre,  $\text{mm}\cdot\text{d}^{-1}$ ), (b) maximum temperature (Tmx,  $^{\circ}\text{C}$ ), (c) vapor pressure deficit (VPD, hPa), (d) root zone soil moisture (SMroot,  $\text{m}^3\cdot\text{m}^{-3}$ ), and (e) diurnal temperature range (DTR,  $^{\circ}\text{C}$ ) during JAS to the standardized IOB index during ND(-1)J. All variables were standardized before analysis. Values represent standardized changes (in  $\sigma$  units) in each variable per  $1\sigma$  increase in the standardized IOB index. Shaded areas with diagonal hatching indicate regions where the response is statistically significant at the 90% confidence level (t-test).
